# Supplementary material for: vwa1 Knockout in Zebrafish Causes Abnormal Craniofacial Chondrogenesis by Regulating FGF Pathway
Source: MDPI journal article supplement (doi:10.3390/genes14040838), 2023-03-30
Supplement: s1 [file s1]

Supplemental Table S1. gRNA targets and verification primers used to amplify the target region.

| Primer name                   | Sequence                                                  |
|-------------------------------|-----------------------------------------------------------|
| <i>vwa1</i> gRNA Target1 F    | TAATACGACTCACTATAGGCTCACATGATCTGGGCCCCTTTAGAGCTAGAAATAGC  |
| Target1 verification primer-F | GTTGAATTGCTGTGAAGGCGA                                     |
| Target1 verification primer-R | CAGTAGGCGGACTCACGAC                                       |
| <i>vwa1</i> gRNA Target2 F    | TAATACGACTCACTATAGGTCGTGAGTCCGCCTACTGGTTTTAGAGCTAGAAATAGC |
| Target2 verification primer-F | TACGAGTTCTCCCGCATGGT                                      |
| Target2 verification primer-R | ACCCACCAATGATTGAGTTCC                                     |
| <i>vwa1</i> gRNA Target3 F    | TAATACGACTCACTATAGGGATCTGTCCCGTCTCATGTTTTAGAGCTAGAAATAGC  |
| Target3 verification primer-F | CATCCGCGCTGAGAGACTG                                       |
| Target3 verification primer-R | TGTGTATGTGCTACTCACCTGT                                    |
| <i>vwa1</i> gRNA Target4 F    | TAATACGACTCACTATAGGCACTCGAAGCGGGCCACTGTTTTAGAGCTAGAAATAGC |
| Target4 verification primer-F | CAGATCCAGCTGTTGTCCTCTT                                    |
| Target4 verification primer-R | GTGTATTAATGTGAACTCTCCTCAC                                 |
| <i>vwa1</i> gRNA R            | AAAAAAAGCACCGACTCGGTGCCAC                                 |

Supplemental Table S2. Primers used in RT-qPCR of *vwa1*, *fgfr1a*, *fgfr2*, *fgfr3*, *fgfr4*, *fgf8a*, *fgf8b*, and *runx2a*.

| Primer name          | Sequence               |
|----------------------|------------------------|
| <i>vwa1</i> qPCR F   | CATCATCGGCGAAGACCTGA   |
| <i>vwa1</i> qPCR R   | GATCTGTCCCGTCTCATGG    |
| <i>fgfr1a</i> qPCR F | CGGAAACTCTATCGGCCACT   |
| <i>fgfr1a</i> qPCR R | GGAGTCCACAGACACTGTTACC |

|                      |                        |
|----------------------|------------------------|
| <i>fgfr2</i> qPCR F  | ATAGGTGTGTTTCTGATCGCCT |
| <i>fgfr2</i> qPCR R  | TGACGACACTGTTACCTGGC   |
| <i>fgfr3</i> qPCR F  | AGTAGTTCTGTCCTGCACGC   |
| <i>fgfr3</i> qPCR R  | CCTGCCTCGTCCTCATCTTC   |
| <i>fgfr4</i> qPCR F  | CTCTTGGACGTGTTGGAACG   |
| <i>fgfr4</i> qPCR R  | GGAATGCCATCAGGCCCAT    |
| <i>fgf8a</i> qPCR F  | GCCGTAGACTAATCCGGACC   |
| <i>fgf8a</i> qPCR R  | TGGCTTCACTCTTCAACGCT   |
| <i>fgf8b</i> qPCR F  | TGAGGCTGAAATCATCGAGGT  |
| <i>fgf8b</i> qPCR R  | GTTTACCGCTGGTTCGGCTA   |
| <i>runx2a</i> qPCR F | CAACTTTCTGTGCTCGGTGC   |
| <i>runx2a</i> qPCR R | GCGGTGGGTTCGTGAATACT   |
| <i>actb1</i> qPCR F  | ACCACGGCCGAAAGAGAAAT   |
| <i>actb1</i> qPCR R  | ATGTCCACGTCGCACTTCAT   |

Supplemental Table S3. Primers used in the cloning of *crestin*, *dlx2a*, *tbx1*, *barx1*, *nkx2.3*, *fgf8a*, *fgfr2*, *fgfr3*, *sox9a*, and *col2a1a* for RNA probe synthesis before whole-mount in situ hybridization.

| Primer name              | Sequence                  |
|--------------------------|---------------------------|
| <i>crestin</i> in situ F | GAGAAGCCCTCATCAGAGAGTTTG  |
| <i>crestin</i> in situ R | GTTGCTTGTCTCAGGCAGAATCAGG |
| <i>dlx2a</i> in situ F   | CACAGTTCTGCTTTGCGTCG      |
| <i>dlx2a</i> in situ R   | CCCAAGTCGGCAGAGTCAAA      |
| <i>tbx1</i> in situ F    | GCAGCTGTCCATTTTTCG        |
| <i>tbx1</i> in situ R    | ACGGCGGTAAATCTGGTCTC      |
| <i>barx1</i> in situ F   | CTGGGCGGATCAGACTTCTC      |
| <i>barx1</i> in situ R   | GCTTCTCGTGTCTCTCTCTG      |
| <i>nkx2.3</i> in situ F  | TCGTGTTTTCTCGGAGGTGG      |
| <i>nkx2.3</i> in situ R  | GCGCATTAGTGGACGTGTTC      |
| <i>sox9a</i> in situ F   | CCTCGACCCCTACCTGAAGA      |
| <i>sox9a</i> in situ R   | GGCGGGAGGTATTGGTCAAA      |
| <i>col2a1a</i> in situ F | TCTGAAGTCCATCAACGGGC      |
| <i>col2a1a</i> in situ R | TTTTCCGTCACGCTAAACGC      |

|                        |                      |
|------------------------|----------------------|
| <i>fgf8a</i> in situ F | GCCGTAGACTAATCCGGACC |
| <i>fgf8a</i> in situ R | TGGCTTCACTCTTCAACGCT |
| <i>fgfr2</i> in situ F | GACCCTGATCATGGAGAGCG |
| <i>fgfr2</i> in situ R | TGACGACACTGTTACCTGGC |
| <i>fgfr3</i> in situ F | CGCAAGACTTCCTCCTTCCC |
| <i>fgfr3</i> in situ R | AGTGTGCTTGATTGTCCCGT |

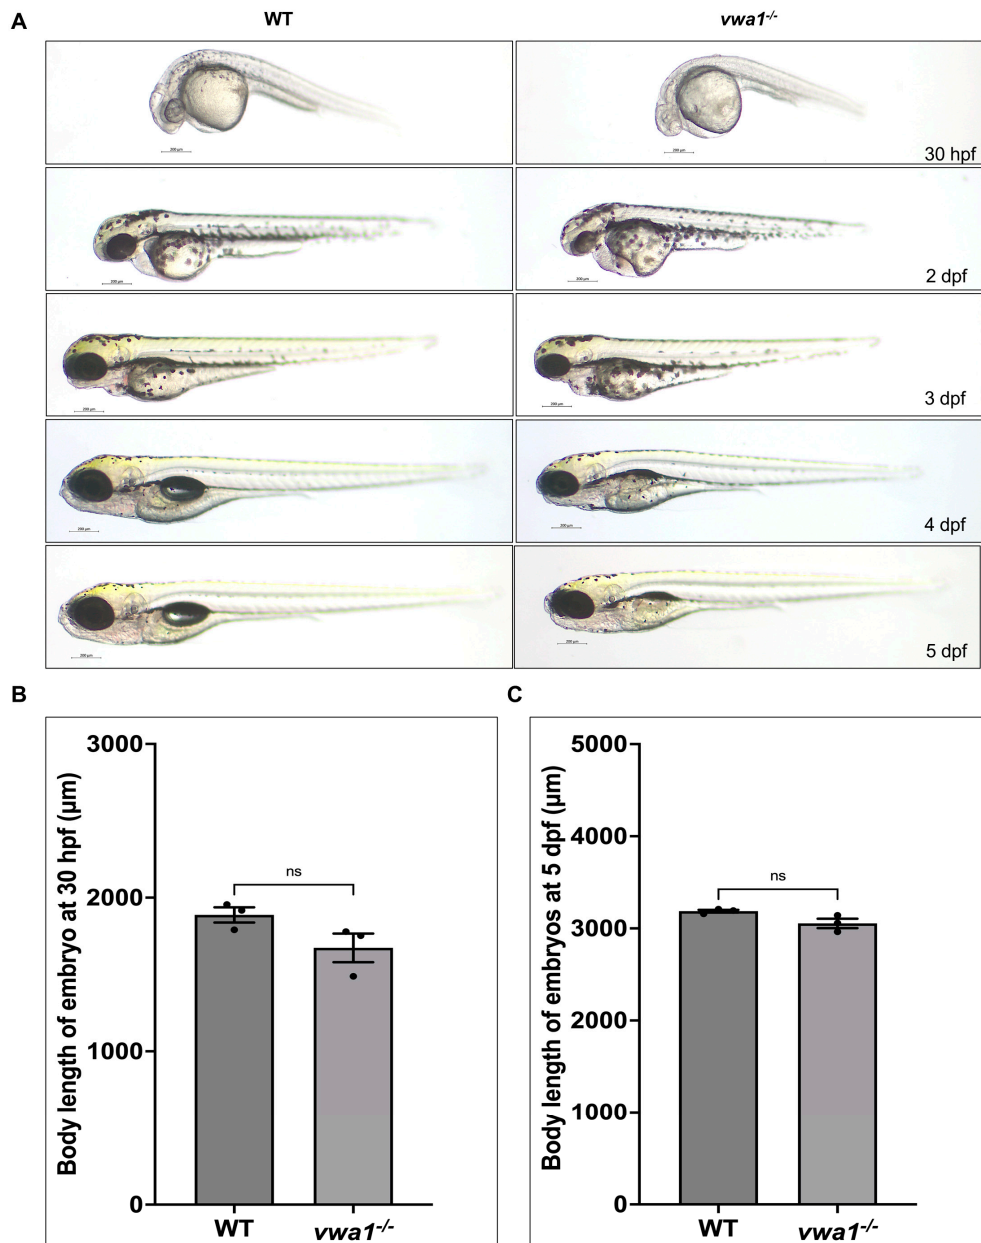

**Supplemental Figure S1.** Comparison of the body sizes of *vwa1*<sup>-/-</sup> mutants and wildtype controls from 30 hpf to 5 dpf. **(A)** Light microscopy demonstrated some *vwa1*<sup>-/-</sup> mutants had shorter body lengths and smaller head circumferences than the wildtype control (WT). **(B, C)** There was no statistical size difference in body length

between mutants and WT at 30 hpf and 5 dpf, although the average body length of the mutants was slightly shorter than WT.

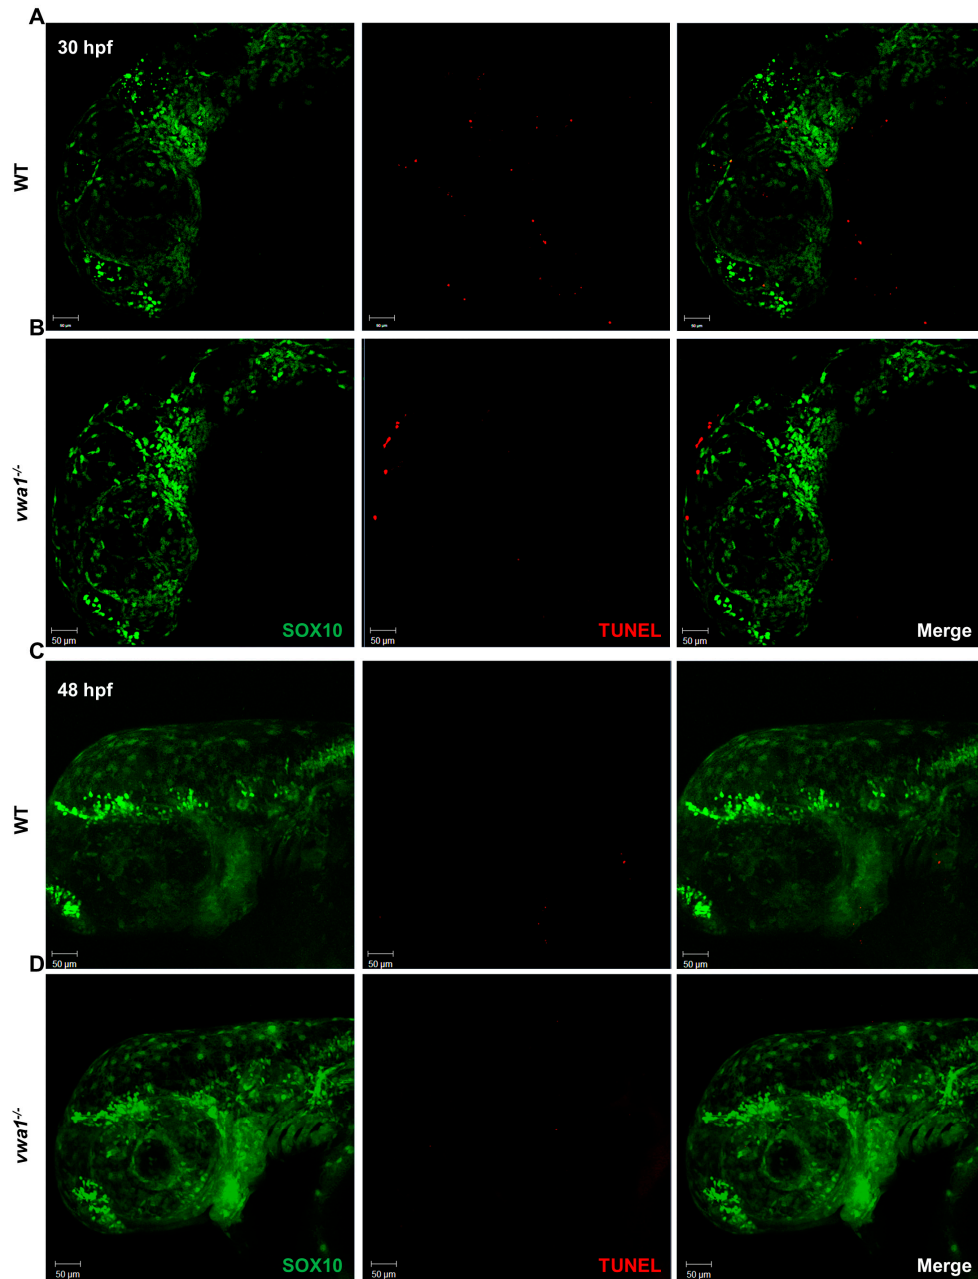

**Supplemental Figure S2.** Apoptosis did not significantly increase in *vwa1*<sup>-/-</sup> mutants at 30 and 48 hpf. (A, B) TUNEL assay (red fluorescence) at 30 hpf demonstrated similar amount of apoptosis cells in the cranial region and dorsal tissues of wildtype controls (WT) and mutants. (C, D) TUNEL assay (red fluorescence) at 48 hpf showed similar level of apoptosis in WT and mutants
